# Supplementary material
Source: PubMed Central journal article supplement (PMC7610833)
Supplement: EMS124554-supplement-Supplementary_Material.pdf [file EMS124554-supplement-Supplementary_Material.pdf]

819 **Extended Figure Legends:**

820

821 **Figure S1: Cross-sectional SARS-CoV-2 Ab responses overtime.** a) IgM, IgA and IgG OD  
822 values against S, RBD and N are binned based on days post onset of symptoms (POS). The  
823 data is grouped based on disease severity, 0-3 (black) and 4/5 (red). The mean OD value is  
824 shown for each time window for both the 0-3 and 4/5 severity groups. OD = optical density.  
825 b) ID<sub>50</sub> measured using the SARS-CoV-2 pseudotype neutralization assay are binned based  
826 on days post onset of symptoms (POS). The data is grouped based on disease severity, 0-3  
827 (black) and 4/5 (red). The mean ID<sub>50</sub> value is shown for each time window for both the 0-3  
828 and 4/5 severity groups.

829

830 **Figure S2: Antibody isotype and specificity at the first time point for which an individual**  
831 **became seropositive.** A) A cumulative frequency analysis describing the seroconversion in  
832 the hospitalized cohort. Graph shows the percentage of individuals in the cohort that  
833 become IgM, IgA or IgG seropositive to S, RBD and N. B) Patterns of seroconversion based  
834 on antigen and Ab isotype for a subset of donors from whom sera was collected over  
835 sequential early time points (<14 days POS, n=31). For individuals with at least 2 sera  
836 collected <14 days POS, the first antigen(s) and Ab isotype(s) that gave an OD that was 4-  
837 fold above background is reported. C) Pseudovirus neutralization and ELISA binding at early  
838 time points POS for a subset of individuals where there was measurable neutralization titres  
839 but IgG binding to S is low (OD <0.2) and IgM and/or IgA to S is higher (OD >0.4).

840

841 **Figure S3: Correlations between OD values and ID<sub>50</sub>.** a) Correlation of ID<sub>50</sub> with IgG, IgM,  
842 IgA OD values (at 1:50) against S, RBD and N (Spearman correlation, r). b) Correlation of ID<sub>50</sub>

843 measured using wild-type virus and ID<sub>50</sub> measured using pseudovirus neutralization assays  
844 (Spearman correlation, r). A linear regression was used to calculate the goodness of fit (r<sup>2</sup>).  
845

846 **Figure S4: Ab responses in HCW cohort.** A) Ab responses (IgG and IgM to S, RBD and N) over  
847 time. Each line represents one individual. Asymptomatic individuals shown in green,  
848 symptomatic individuals shown in black and PCR+ HCW shown in red (for comparison). The  
849 dotted line represents day 0 post onset of symptoms. B) Correlation of ID<sub>50</sub> with IgG and  
850 IgM OD values against S and N (Spearman correlation, r). A linear regression was used to  
851 calculate the goodness of fit (r<sup>2</sup>).

852

853

854

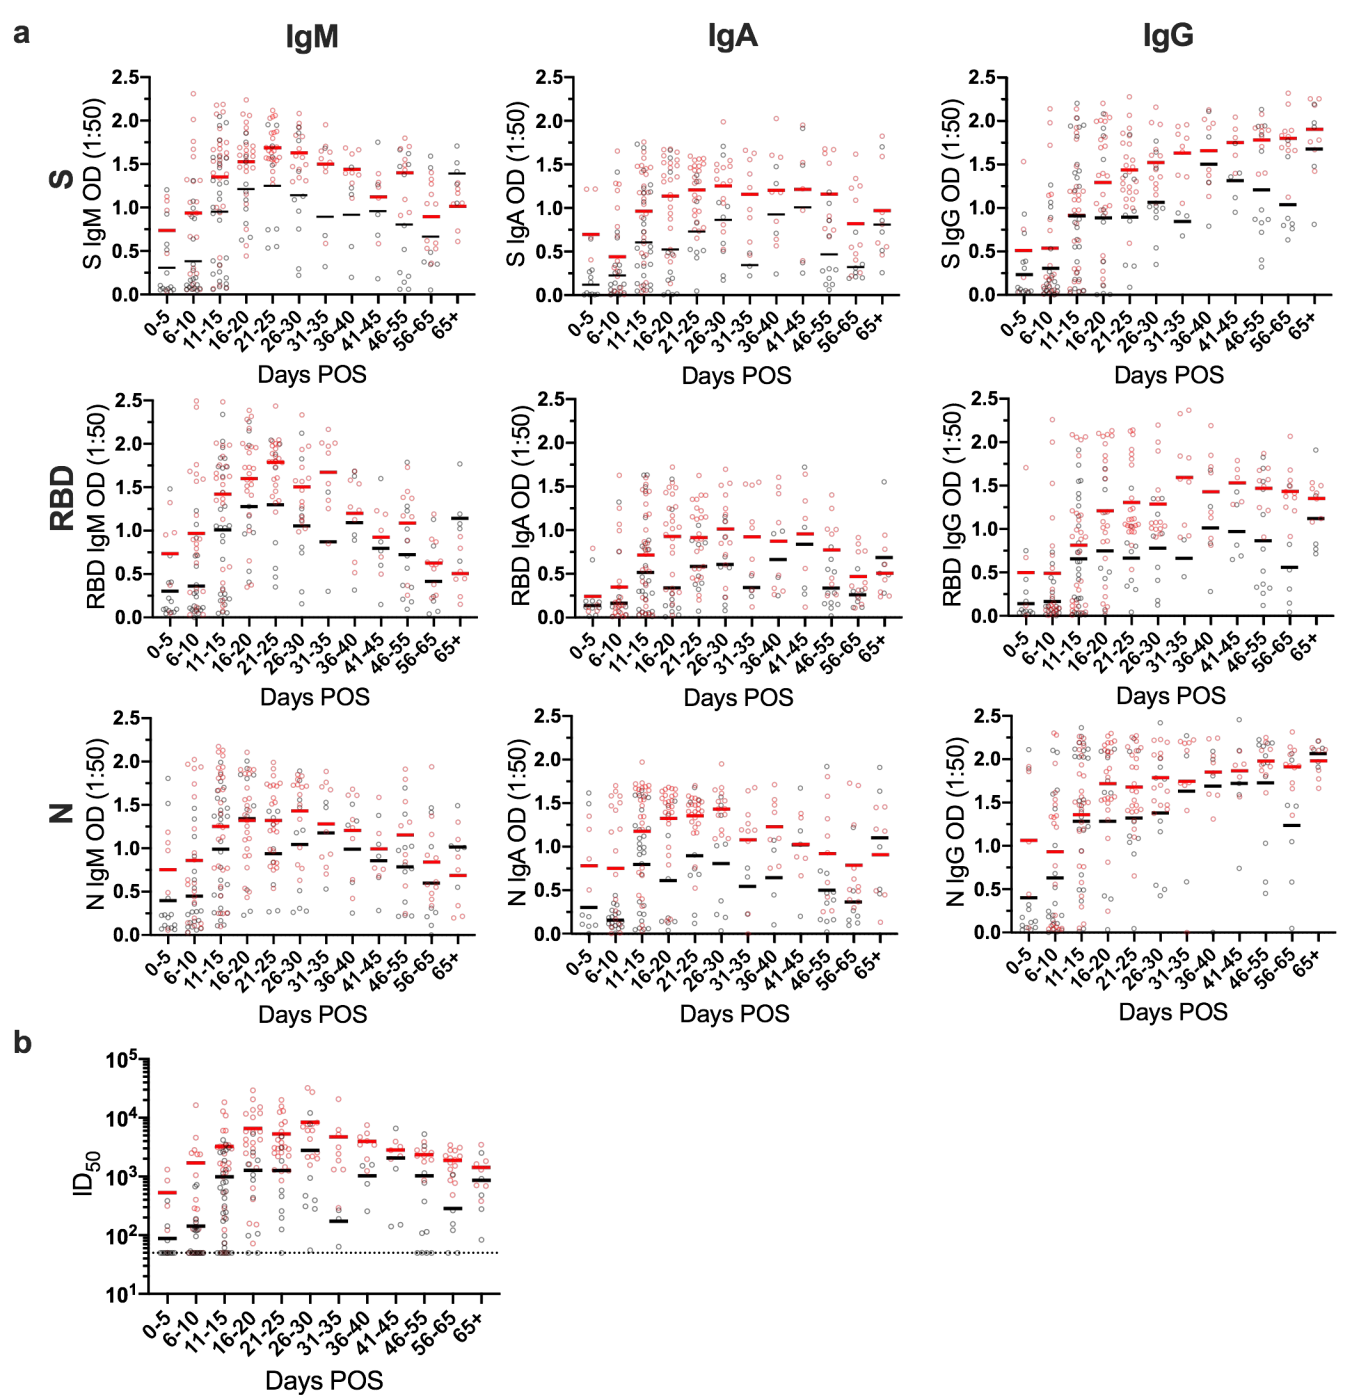

**a**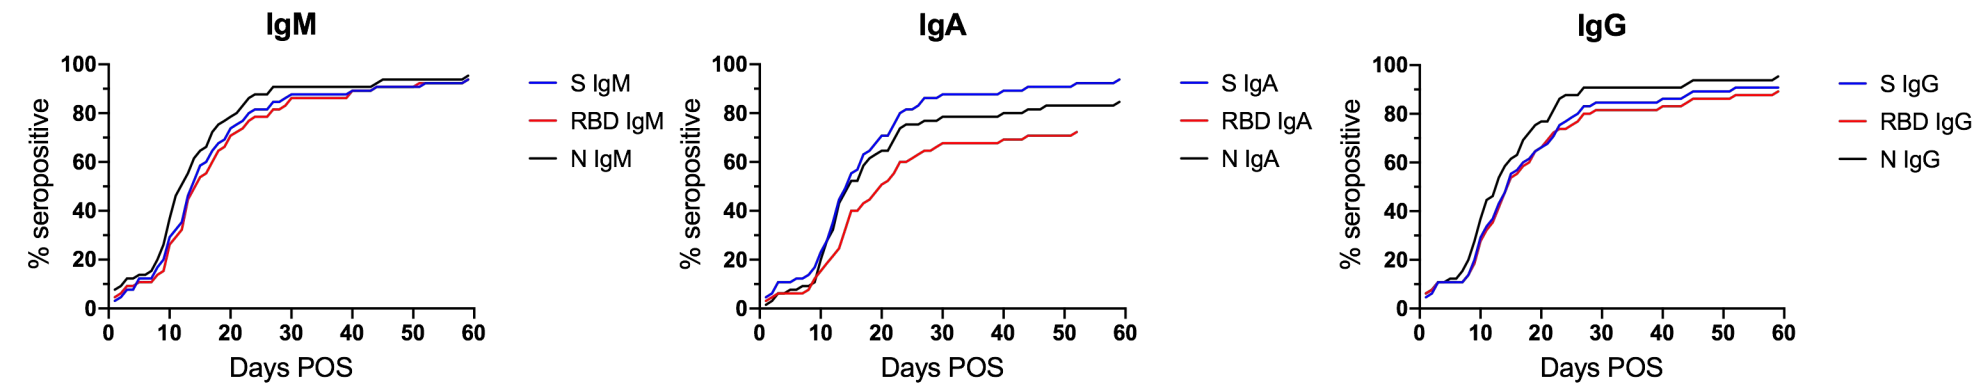**b**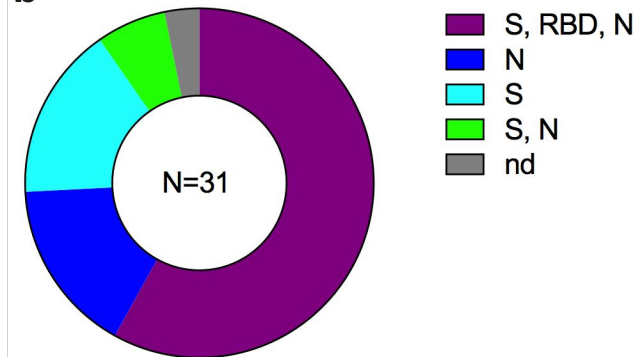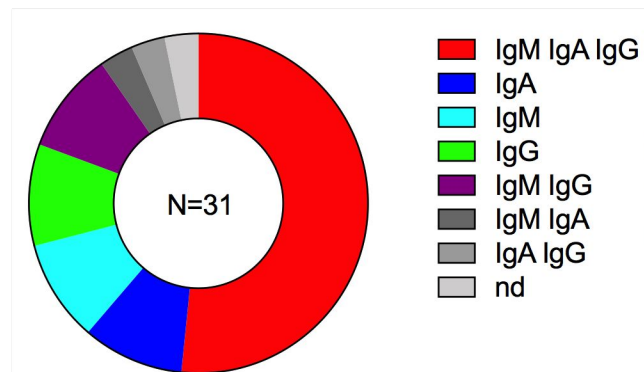**c**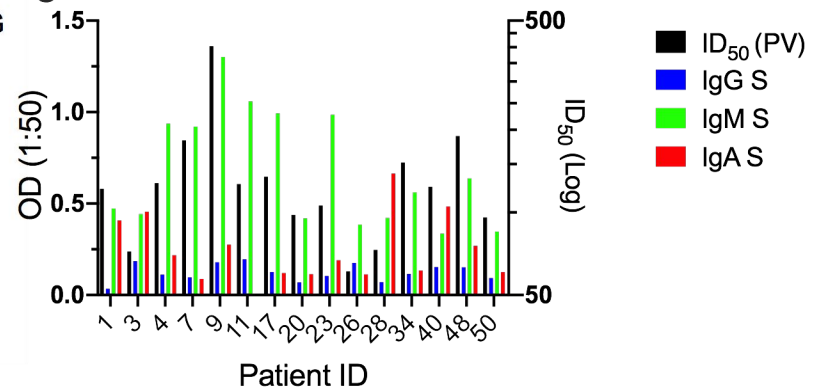

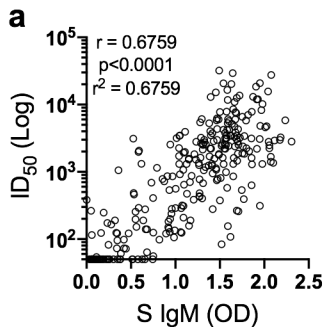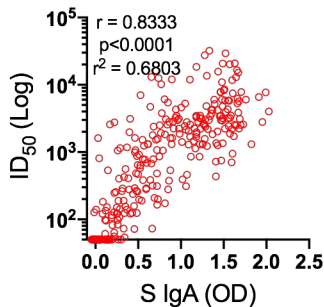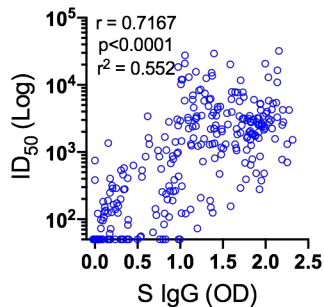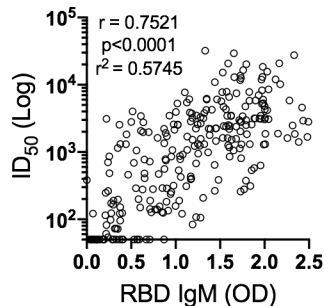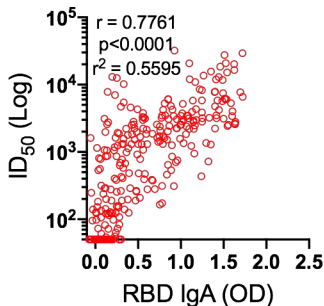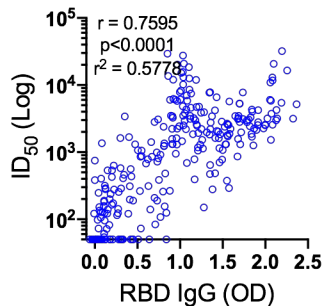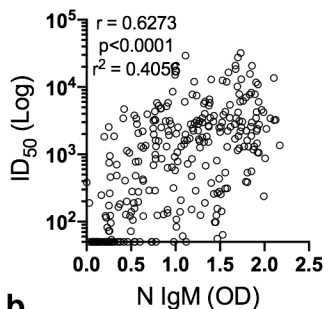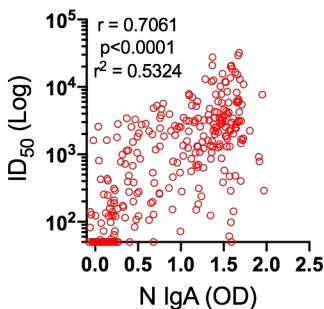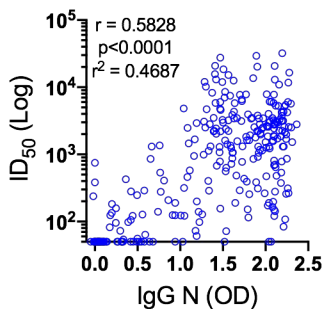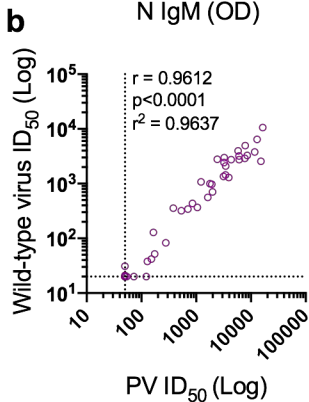

**a**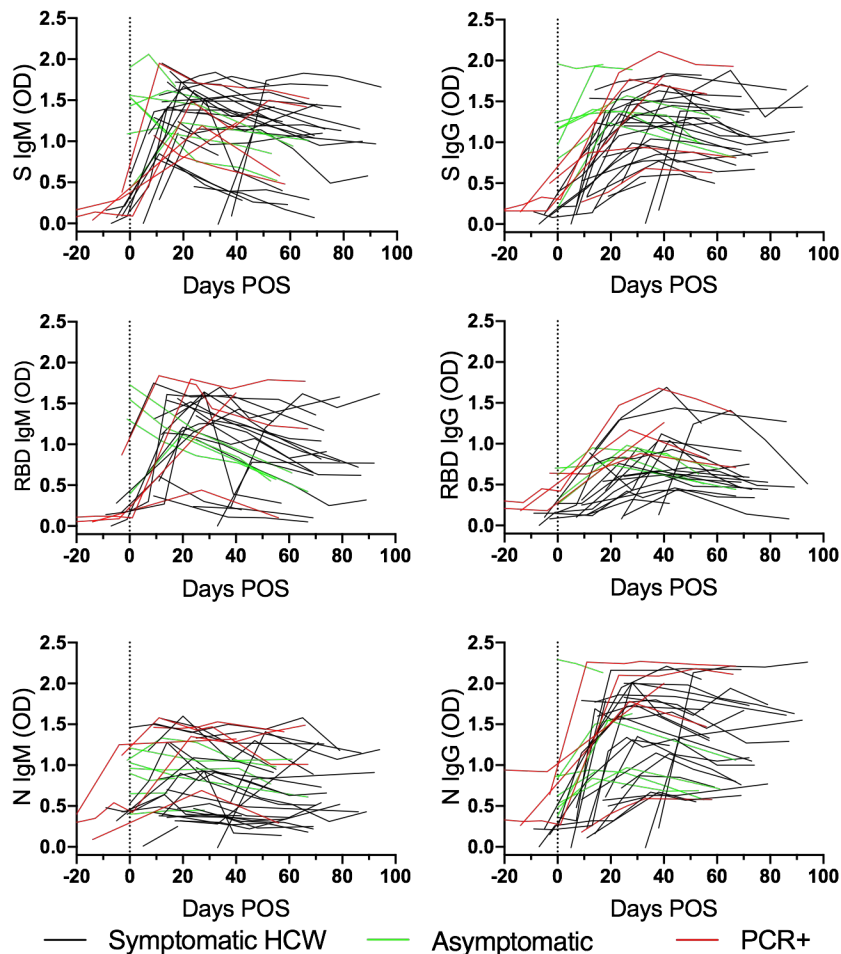**b**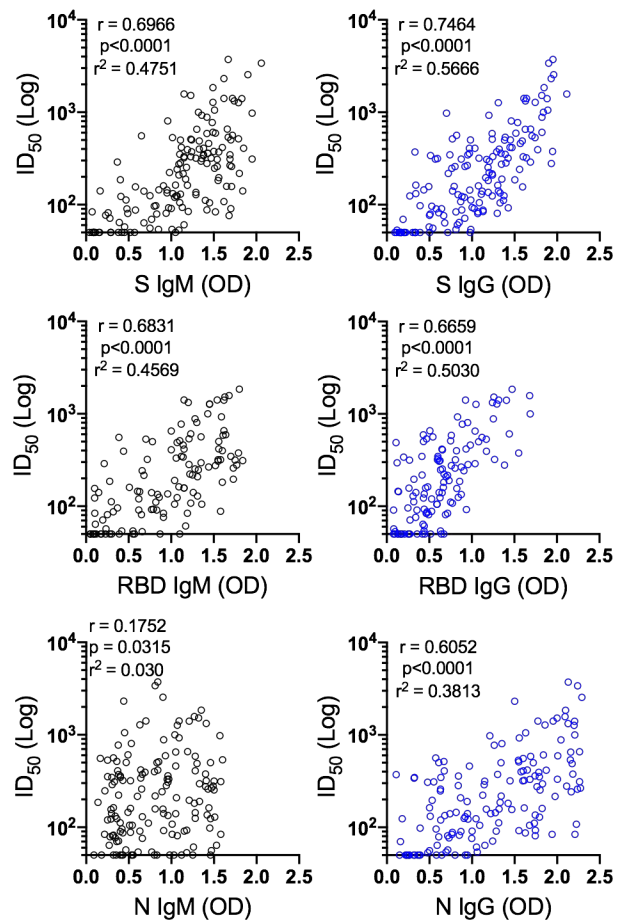

860 **Table S1: Patient information.** Age range, comorbidities, disease severity, hyper-  
861 inflammatory status, gender and outcome are listed for each hospitalized participant.  
862 Hyper-inflammatory (HI), Atrial fibrillation (AF), acute myeloid leukaemia (AML), cancer (ca),  
863 chronic kidney disease (CKD), chronic obstructive pulmonary disease (COPD), end-stage  
864 renal failure (ESRF), hypertension (HTN), ischaemic heart disease (IHD), interstitial lung  
865 disease (ILD), non-alcoholic fatty liver disease (NAFLD), simultaneous pancreatic/kidney  
866 transplant (SPK), type 1 diabetes mellitus (T1DM), type 2 diabetes mellitus (T2DM), venous  
867 thromboembolism (VTE)  
868

| Donor number | Severity score | Hyper-inflammatory | Comorbidities                               | Age range | Sex | Final outcome                 |
|--------------|----------------|--------------------|---------------------------------------------|-----------|-----|-------------------------------|
| 1            | 4              | N                  | asthma, HTN, obesity, T2DM, sarcoidosis     | 50-59     | M   | Died                          |
| 2            | 4              | Y                  | obesity                                     | 50-59     | M   | Died                          |
| 3            | 4              | N                  | HTN                                         | 40-49     | M   | Died                          |
| 4            | 4              | Y                  | AF, HTN, obesity, sarcoidosis,              | 60-69     | M   | Discharged                    |
| 5            | 4              | N                  | HTN, T2DM                                   | 60-69     | M   | Discharged                    |
| 6            | 4              | Y                  | T1DM                                        | 40-49     | M   | Ward                          |
| 7            | 4              | Y                  | Hypothyroidism                              | 70-79     | M   | Discharged                    |
| 8            | 4              | Y                  | T2DM, NAFLD                                 | 50-59     | M   | Died                          |
| 9            | 4              | Y                  | HTN, IHD                                    | 70-79     | M   | Died                          |
| 10           | 4              | Y                  | T2DM                                        | 70-79     | M   | Died                          |
| 11           | 4              | N                  | HTN, prostate ca                            | 70-79     | M   | Discharged                    |
| 12           | 4              | Y                  | none                                        | 40-49     | M   | Discharged                    |
| 13           | 4              | Y                  | none                                        | 50-59     | M   | Ward                          |
| 14           | 4              | N                  | obesity, T2DM                               | 50-59     | F   | Discharged                    |
| 15           | 4              | N                  | COPD                                        | 70-79     | M   | Discharged                    |
| 16           | 2              | N                  | none                                        | 50-59     | M   | Discharged                    |
| 17           | 1              | N                  | obesity                                     | 30-39     | F   | Discharged                    |
| 18           | 1              | N                  | CKD, dementia, HTN, IHD, obesity, VTE       | 70-79     | F   | Discharged                    |
| 19           | 2              | N                  | AF                                          | 90-99     | M   | Discharged                    |
| 20           | 2              | N                  | dementia, T2DM                              | 60-69     | M   | Discharged                    |
| 21           | 1              | N                  | hepatitis C, Huntingdon's disease           | 60-69     | M   | Discharged                    |
| 22           | 1              | N                  | AF, dementia, HTN, stroke                   | 80-89     | M   | Discharged                    |
| 23           | 1              | N                  | CKD, T2DM, VTE                              | 60-69     | M   | Died                          |
| 24           | 4              | N                  | chronic pancreatitis, T2DM                  | 60-69     | M   | Ward                          |
| 25           | 1              | N                  | AF, Marfan's syndrome                       | 50-59     | M   | Discharged                    |
| 26           | 0              | N                  | ESRF, obesity, T1DM                         | 20-29     | F   | Discharged                    |
| 28           | 4              | N                  | none                                        | 40-49     | M   | Discharged                    |
| 29           | 0              | N                  | ESRF, T1DM, SPK                             | 40-49     | M   | Discharged                    |
| 31           | 0              | N                  | ESRF, obesity                               | 20-29     | F   | Discharged                    |
| 32           | 4              | N                  | HTN, T2DM                                   | 60-69     | M   | Discharged                    |
| 33           | 4              | N                  | HTN, obesity                                | 60-69     | F   | Discharged                    |
| 34           | 4              | Y                  | asthma, obesity                             | 50-59     | F   | Discharged                    |
| 35           | 4              | N                  | none                                        | 40-49     | M   | Discharged                    |
| 36           | 4              | Y                  | none                                        | 30-39     | M   | Discharged                    |
| 37           | 4              | N                  | asthma, inflammatory polyarthritis, obesity | 60-69     | M   | Discharged                    |
| 38           | 4              | N                  | none                                        | 30-39     | M   | Discharged                    |
| 39           | 4              | N                  | T2DM, obesity                               | 30-39     | M   | Discharged                    |
| 40           | 5              | N                  | obesity                                     | 30-39     | F   | Discharged                    |
| 41           | 5              | Y                  | none                                        | 60-69     | M   | Discharged                    |
| 42           | 5              | N                  | asthma, obesity                             | 40-49     | M   | Transferred to local hospital |
| 43           | 5              | Y                  | HTN                                         | 50-59     | M   | Transferred to local hospital |
| 44           | 5              | N                  | none                                        | 50-59     | M   | Died                          |
| 45           | 5              | N                  | none                                        | 50-59     | M   | Discharged                    |
| 46           | 5              | Y                  | asthma, obesity, T2DM                       | 50-59     | M   | Died                          |
| 47           | 2              | N                  | none                                        | 20-29     | M   | Discharged                    |
| 48           | 3              | N                  | depression, obesity, T1DM                   | 50-59     | M   | Discharged                    |
| 49           | 1              | N                  | HTN, T2DM                                   | 60-69     | M   | Discharged                    |
| 50           | 2              | N                  | none                                        | 60-69     | M   | Discharged                    |
| 51           | 2              | N                  | none                                        | 30-39     | M   | Discharged                    |
| 52           | 0              | N                  | AF, ESRF, T2DM                              | 60-69     | M   | Ward                          |
| 53           | 2              | N                  | HTN, obesity                                | 50-59     | M   | Discharged                    |
| 54           | 0              | N                  | AML                                         | 20-29     | F   | Discharged                    |
| 55           | 3              | N                  | bladder ca                                  | 60-69     | M   | Died                          |
| 56           | 1              | N                  | asthma                                      | 50-59     | M   | Discharged                    |
| 57           | 0              | N                  | dementia, frailty, Parkinsonism             | 90-99     | M   | Died                          |
| 58           | 1              | N                  | CKD, frailty                                | 90-99     | F   | Died                          |
| 59           | 0              | N                  | CCF, IHD, PVD, stroke, T2DM                 | 80-89     | M   | Transferred to local hospital |
| 60           | 0              | N                  | mycosis fungoides,                          | 50-59     | F   | Ward                          |
| 61           | 1              | N                  | COPD, bronchiectasis, renal transplant      | 70-79     | M   | Discharged                    |



871  
872  
873  
874  
875  
876

**Table S2: Cumulative frequency of seropositivity for SARS-CoV-2 antigens.** Percentage of individuals that become seropositive (IgM, IgA, IgG) in a specific time window for antigens S, RBD and N in ELISA. A sample was considered seropositive when the OD value was four-fold above background.

| Days POS | Cumulative seropositivity (%) |      |      |      |      |      |      |      |      |                   |
|----------|-------------------------------|------|------|------|------|------|------|------|------|-------------------|
|          | IgG                           |      |      | IgM  |      |      | IgA  |      |      | IgG or IgM or IgA |
|          | S                             | RBD  | N    | S    | RBD  | N    | S    | RBD  | N    |                   |
| 7        | 10.8                          | 10.8 | 15.4 | 12.3 | 10.8 | 15.4 | 12.3 | 6.2  | 9.2  | 21.5              |
| 14       | 47.7                          | 47.7 | 58.5 | 52.3 | 49.2 | 61.5 | 49.2 | 32.3 | 47.7 | 66.2              |
| 21       | 67.7                          | 69.2 | 76.9 | 75.4 | 72.3 | 80.0 | 70.8 | 52.3 | 64.6 | 86.2              |
| 28       | 83.1                          | 80.0 | 90.8 | 84.6 | 81.5 | 90.8 | 86.2 | 64.6 | 76.9 | 93.8              |
| 35       | 84.6                          | 81.5 | 90.8 | 87.7 | 86.2 | 90.8 | 87.7 | 67.7 | 78.5 | 93.8              |
| 42       | 86.2                          | 83.1 | 90.8 | 89.2 | 89.2 | 90.8 | 89.2 | 69.2 | 80.0 | 93.8              |
| 49       | 89.2                          | 86.2 | 93.8 | 90.8 | 90.8 | 93.8 | 90.8 | 70.8 | 83.1 | 95.4              |
| 56       | 90.8                          | 87.7 | 93.8 | 92.3 | 92.3 | 93.8 | 92.3 | 72.3 | 83.1 | 95.4              |
| 63       | 92.3                          | 89.2 | 93.8 | 92.3 | 92.3 | 95.4 | 93.8 | 72.3 | 84.6 | 96.9              |

877  
878  
879  
880  
881  
882  
883  
884  
885  
886  
887

**Table S3: ID<sub>50</sub> summary at different days post onset of symptoms.** Percentage of individuals in a given time window with undetectable (ID<sub>50</sub> <50), low (ID<sub>50</sub> 50-200), medium (ID<sub>50</sub> 201-500), high (ID<sub>50</sub> 501-2000) or potent (ID<sub>50</sub> 2000+) nAb titres. Every serum sample from all individuals in the PCR+ hospital cohort is included in this table. Historic healthy control sera samples were collected before the COVID-19 global pandemic and tested at 1:20 dilution.

|              | ID <sub>50</sub>  | ID <sub>50</sub> | Covid | Days post onset of symptoms |       |        |       |       |       |       |       |       |       |       |       |      |
|--------------|-------------------|------------------|-------|-----------------------------|-------|--------|-------|-------|-------|-------|-------|-------|-------|-------|-------|------|
|              |                   |                  |       | 0-5                         | 6-10. | 11-15. | 16-20 | 21-25 | 26-30 | 31-35 | 36-40 | 41-45 | 46-50 | 51-55 | 56-65 | 65+  |
| Undetectable | <50               | 3.1              | 100   | 55.6                        | 40.0  | 16.1   | 5.7   | 3.0   | 4.3   | 0.0   | 0.0   | 0.0   | 0.0   | 25.0  | 11.8  | 0.0  |
| Low          | 50-200            | 7.7              | 0     | 16.7                        | 30.0  | 14.3   | 14.3  | 6.1   | 4.3   | 16.7  | 0.0   | 22.2  | 12.5  | 8.3   | 11.8  | 8.3  |
| Medium       | 201-500           | 10.8             | 0     | 16.7                        | 7.5   | 8.9    | 5.7   | 6.1   | 17.4  | 16.7  | 8.3   | 0.0   | 0.0   | 8.3   | 11.8  | 25.0 |
| High         | 501-2000          | 18.5             | 0     | 11.1                        | 7.5   | 28.6   | 20.0  | 21.2  | 8.7   | 25.0  | 41.7  | 22.2  | 12.5  | 33.3  | 35.3  | 50.0 |
| Potent       | 2000+             | 60.0             | 0     | 0.0                         | 15.0  | 32.1   | 54.3  | 63.6  | 65.2  | 41.7  | 50.0  | 55.6  | 75.0  | 25.0  | 29.4  | 16.7 |
|              | Number of samples | 65               | 25    | 18                          | 40    | 56     | 35    | 33    | 23    | 12    | 12    | 9     | 8     | 12    | 17    | 12   |

888  
889
